# Supplementary material
Source: HighWire-hosted journal article supplement (https://jnm.snmjournals.org/highwire/filestream/93905/field_highwire_adjunct_files/0/44354_Supplemental_Tables.pdf)
Supplement: 44354_Supplemental_Tables.pdf [file 44354_Supplemental_Tables.pdf]

**Supplemental Table S1.** Anthropometric measurements for use in the multiple regression analysis.

| <b>Parameter</b>               | <b>Abbreviation</b> | <b>Measurement (cm)</b>                                                                                                                                                                                                                      |
|--------------------------------|---------------------|----------------------------------------------------------------------------------------------------------------------------------------------------------------------------------------------------------------------------------------------|
| Height                         | HT                  | Total body height measured on the CT scout images.                                                                                                                                                                                           |
| Os coxae width                 | OC.W                | Maximum width of the os coxae in the coronal plane.                                                                                                                                                                                          |
| Os coxae height                | OC.H                | Average of the maximum heights of the left and right side of the os coxae in the coronal plane.                                                                                                                                              |
| Bitrochanteric breadth         | Bi.B                | Distance between the outermost portions of the greater trochanters in the coronal plane.                                                                                                                                                     |
| Anterior sacral height         | ASH                 | Distance from the anterior sacral promontory to the apex of the sacrum in the sagittal plane.                                                                                                                                                |
| Sacral width                   | S.W                 | Maximum width of the sacrum in the transverse plane.                                                                                                                                                                                         |
| L <sub>5</sub> thickness       | L5.T                | Thickness of the fifth lumbar (L <sub>5</sub> ) vertebrae in the sagittal plane. The measurements were made parallel to the anterior surface of the vertebral body and approximately 1.5 cm into the vertebral body.                         |
| S <sub>1</sub> breadth         | S1.B                | Longest diameter of the S <sub>1</sub> sacral plate in the transverse plane.                                                                                                                                                                 |
| Femoral head perimeter         | P                   | Average of the maximum perimeter of the left and right femoral heads in the coronal plane.                                                                                                                                                   |
| Feret's diameter               | FD                  | Average of the FD for the right and left femoral heads measured in the coronal plane. This measurement, based on the femoral head perimeter, represents the longest distance between any two points along the perimeter of the femoral head. |
| Maximum height of femoral head | Max.H               | Maximum height of the femoral head in the coronal plane, calculated as the average of the left and right femoral heads.                                                                                                                      |
| Maximum width of femoral head  | Max.W               | Maximum width of the femoral head in the coronal plane, calculated as the average of the left and right femoral heads.                                                                                                                       |
| Humeral head breadth           | HH                  | Distance between the outermost portions of the right and left proximal humeral heads in the CT scout image.                                                                                                                                  |
| Femoral height                 | FH                  | Maximum height of the femoral bones in the CT scout image, calculated as the average of the left and right femoral bones.                                                                                                                    |

Modified from Brindle et al. (14).

**Supplemental Table S2.** Cadaver data used in the regression analysis. All skeletal measurements are in cm. TSSV is in given in units of cm<sup>3</sup>. Abbreviations are from Table 2. The data corresponding to the first ten cadavers are from Ref. (14).

| Cadaver | Sex | Age (y) | HT    | OC.W | OC.H | Bi.B | ASH  | S.W  | L5.T | S1.B | P    | FD  | Max.H | Max.W | HH   | FH   | TSSV (cm <sup>3</sup> ) |
|---------|-----|---------|-------|------|------|------|------|------|------|------|------|-----|-------|-------|------|------|-------------------------|
| 1       | M   | 35      | 188.2 | 32.7 | 23.3 | 29.7 | 11.7 | 12.7 | 2.8  | 6.1  | 16.1 | 5.2 | 4.8   | 5.3   | 46.8 | 52.3 | 2493.20                 |
| 2       | M   | 66      | 172.2 | 28.7 | 21.8 | 26.9 | 12.9 | 13.2 | 2.4  | 5.5  | 14.5 | 4.7 | 4.5   | 4.9   | 35.6 | 47.7 | 2151.14                 |
| 3       | F   | 77      | 156.8 | 29.7 | 20.1 | 31.0 | 10.3 | 11.9 | 2.2  | 4.0  | 12.7 | 4.1 | 4.0   | 3.9   | 34.1 | 41.9 | 1265.24                 |
| 4       | M   | 68      | 181.2 | 27.6 | 21.6 | 27.4 | 10.7 | 10.8 | 2.4  | 5.1  | 15.3 | 5.0 | 4.7   | 5.1   | 39.9 | 50.2 | 2380.45                 |
| 5       | M   | 81      | 175.8 | 29.3 | 23.1 | 28.5 | 11.4 | 13.8 | 2.5  | 5.8  | 15.1 | 4.9 | 4.5   | 5.0   | 38.6 | 48.5 | 2852.19                 |
| 6       | M   | 72      | 165.2 | 27.6 | 21.3 | 29.9 | 10.4 | 11.6 | 2.4  | 5.5  | 14.7 | 4.7 | 4.5   | 4.7   | 38.9 | 47.4 | 2256.33                 |
| 7       | F   | 70      | 159.1 | 33.6 | 20.1 | 30.3 | 9.2  | 12.9 | 2.5  | 4.7  | 12.8 | 4.2 | 3.9   | 4.2   | 38.6 | 42.8 | 1364.31                 |
| 8       | F   | 62      | 157.5 | 26.3 | 20.0 | 24.6 | 8.5  | 11.7 | 2.4  | 5.0  | 12.4 | 4.1 | 3.7   | 4.0   | 33.3 | 43.0 | 1426.07                 |
| 9       | M   | 67      | 171.1 | 31.5 | 21.3 | 27.9 | 11.3 | 13.1 | 2.8  | 5.6  | 14.6 | 4.8 | 4.3   | 4.7   | 38.7 | 47.3 | 2300.99                 |
| 10      | M   | 78      | 175.0 | 33.6 | 22.5 | 28.5 | 12.5 | 12.0 | 2.7  | 5.6  | 14.9 | 4.8 | 4.4   | 4.9   | 41.3 | 49.3 | 2318.72                 |
| 11      | F   | 82      | 162.9 | 32.3 | 20.5 | 27.2 | 10.5 | 12.5 | 2.2  | 5.7  | 13.2 | 4.4 | 3.9   | 4.3   | 38.4 | 46.0 | 1410.27                 |
| 12      | F   | 78      | 149.9 | 28.3 | 19.7 | 27.1 | 10.1 | 11.4 | 2.6  | 5.4  | 12.7 | 4.1 | 3.9   | 4.1   | 34.7 | 41.4 | 1354.31                 |
| 13      | F   | 73      | 159.6 | 30.3 | 20.8 | 28.2 | 13.2 | 12.5 | 2.3  | 4.6  | 13.2 | 4.3 | 4.3   | 4.2   | 34.8 | 43.0 | 1764.06                 |
| 14      | M   | 76      | 165.0 | 23.6 | 20.9 | 24.9 | 10.2 | 10.9 | 2.6  | 4.9  | 13.6 | 4.4 | 4.1   | 4.5   | 34.7 | 42.6 | 2137.16                 |
| 15      | F   | 64      | 168.0 | 32.0 | 20.3 | 26.7 | 12.1 | 13.7 | 2.3  | 5.6  | 12.0 | 3.9 | 3.6   | 3.9   | 35.9 | 45.5 | 1585.72                 |
| 16      | F   | 68      | 158.4 | 31.2 | 20.3 | 31.1 | 8.7  | 11.9 | 2.5  | 5.1  | 12.4 | 4.0 | 3.8   | 3.9   | 35.9 | 42.6 | 1661.10                 |
| 17      | F   | 80      | 156.9 | 33.8 | 21.1 | 28.3 | 12.1 | 13.7 | 2.1  | 3.7  | 12.2 | 4.1 | 3.4   | 4.0   | 34.7 | 44.4 | 1788.23                 |
| 18      | F   | 75      | 165.0 | 30.5 | 20.6 | 31.8 | 11.2 | 12.8 | 2.7  | 4.8  | 12.8 | 4.2 | 4.1   | 4.2   | 35.4 | 43.3 | 1590.72                 |
| 19      | M   | 75      | 169.2 | 26.0 | 20.5 | 26.0 | 11.8 | 11.7 | 2.1  | 4.8  | 12.3 | 4.0 | 4.1   | 4.1   | 38.4 | 43.3 | 1716.77                 |
| 20      | M   | 40      | 168.6 | 30.3 | 21.2 | 31.2 | 11.8 | 12.5 | 2.3  | 4.6  | 13.5 | 4.4 | 4.2   | 4.1   | 41.1 | 46.7 | 1605.73                 |
| 21      | F   | 73      | 157.9 | 28.7 | 20.6 | 30.2 | 13.0 | 12.8 | 2.6  | 6.0  | 14.0 | 4.6 | 4.3   | 4.6   | 32.0 | 42.2 | 1611.88                 |
| 22      | M   | 61      | 176.7 | 27.3 | 22.0 | 29.0 | 11.2 | 12.3 | 2.9  | 5.5  | 14.9 | 4.9 | 4.5   | 4.9   | 37.2 | 49.1 | 1861.87                 |
| 23      | M   | 65      | 171.2 | 27.4 | 22.1 | 32.5 | 9.2  | 12.2 | 2.9  | 5.9  | 15.6 | 5.4 | 5.4   | 4.6   | 43.5 | 47.4 | 2205.28                 |
| 24      | M   | 18      | 177.5 | 28.1 | 22.4 | 31.7 | 11.8 | 12.6 | 3.1  | 5.8  | 15.0 | 4.9 | 4.6   | 4.9   | 43.2 | 46.9 | 2125.40                 |
| 25      | M   | 73      | 173.7 | 29.5 | 23.1 | 32.4 | 9.8  | 13.3 | 2.7  | 6.0  | 16.4 | 5.4 | 5.2   | 5.2   | 41.0 | 47.6 | 2330.17                 |
| 26      | F   | 68      | 164.4 | 28.7 | 20.7 | 30.2 | 10.9 | 13.8 | 2.8  | 4.9  | 15.3 | 5.1 | 4.9   | 4.8   | 35.7 | 45.9 | 1275.71                 |
| 27      | F   | 63      | 162.3 | 26.7 | 20.2 | 29.4 | 11.2 | 12.4 | 3.2  | 4.3  | 12.3 | 4.0 | 3.9   | 3.9   | 36.2 | 44.1 | 1294.98                 |
| 28      | M   | 56      | 177.6 | 27.0 | 21.0 | 30.2 | 12.4 | 11.3 | 2.7  | 5.6  | 16.1 | 5.3 | 5.1   | 5.2   | 42.9 | 46.9 | 1856.28                 |
| 29      | F   | 49      | 182.0 | 32.8 | 23.5 | 31.4 | 11.6 | 13.8 | 3.2  | 5.6  | 14.1 | 4.6 | 4.5   | 4.5   | 40.1 | 49.9 | 1837.11                 |
| 30      | F   | 61      | 152.5 | 26.5 | 18.7 | 25.5 | 11.6 | 11.4 | 2.9  | 4.6  | 13.5 | 4.3 | 4.2   | 4.3   | 34.7 | 40.9 | 1545.60                 |
| 31      | M   | 65      | 158.8 | 26.1 | 19.8 | 26.2 | 9.2  | 10.6 | 2.7  | 5.4  | 13.4 | 4.3 | 4.2   | 4.3   | 36.5 | 43.0 | 1372.11                 |
| 32      | F   | 60      | 160.3 | 27.0 | 19.8 | 29.7 | 12.5 | 12.8 | 2.6  | 5.2  | 13.3 | 4.4 | 4.1   | 4.4   | 37.1 | 42.8 | 1528.78                 |
| 33      | F   | 63      | 160.7 | 26.8 | 20.4 | 29.7 | 11.1 | 13.1 | 3.0  | 4.6  | 12.9 | 4.2 | 4.2   | 4.1   | 35.3 | 44.0 | 1340.00                 |
| 34      | F   | 60      | 172.8 | 28.7 | 21.8 | 28.7 | 12.0 | 12.8 | 3.0  | 4.4  | 14.4 | 4.7 | 4.6   | 4.5   | 37.2 | 47.7 | 1979.25                 |
| 35      | M   | 70      | 172.2 | 28.9 | 22.1 | 31.6 | 11.2 | 13.3 | 2.9  | 5.4  | 16.1 | 5.3 | 5.1   | 5.2   | 43.4 | 45.9 | 2058.80                 |
| 36      | F   | 69      | 161.0 | 24.6 | 19.4 | 28.1 | 11.8 | 11.6 | 2.8  | 3.5  | 12.5 | 4.1 | 4.0   | 4.0   | 33.5 | 42.9 | 1567.89                 |
| 37      | M   | 59      | 166.8 | 27.6 | 22.1 | 29.3 | 12.6 | 12.0 | 3.1  | 5.5  | 15.8 | 5.1 | 5.1   | 5.0   | 40.8 | 45.8 | 2322.50                 |
| 38      | F   | 63      | 164.3 | 26.6 | 21.2 | 30.0 | 10.7 | 12.3 | 2.8  | 5.1  | 14.5 | 4.7 | 4.2   | 4.7   | 34.7 | 43.6 | 1694.59                 |
| 39      | M   | 75      | 181.8 | 29.1 | 23.2 | 32.0 | 12.5 | 12.9 | 2.8  | 6.4  | 16.2 | 5.2 | 5.2   | 5.1   | 42.6 | 50.3 | 2414.21                 |
| 40      | M   | 74      | 176.6 | 26.9 | 23.0 | 29.3 | 13.6 | 12.4 | 2.7  | 5.4  | 16.4 | 5.5 | 5.0   | 5.5   | 41.9 | 48.9 | 2310.57                 |

**Supplemental Table S3.** Comparison of our skeletal measurements to those found in the literature. Skeletal measurements for which we found no data in the literature are excluded from the table. All measurements correspond to white males and females in the United States.

| Sex    | Sample Size | Age   |      | HT          | OC.H       | ASH        | S.W        | L5.T      | S1.B      | Femoral Head |           | FH         | Source                                                                                                  |
|--------|-------------|-------|------|-------------|------------|------------|------------|-----------|-----------|--------------|-----------|------------|---------------------------------------------------------------------------------------------------------|
|        |             | Range | Mean |             |            |            |            |           |           | FD           | Max.H     |            |                                                                                                         |
| Male   | 20          | 18-81 | 64   | 173.2 (6.7) | 21.9 (1.0) | 11.4 (1.2) | 12.3 (0.9) | 2.7 (0.3) | 5.5 (0.4) | 4.9 (0.4)    | 4.7 (0.4) | 47.4 (2.5) | Present study / Ref. (15)<br>Hamann-Todd Collection<br>Ref. (16)<br>Ref. (35)<br>Ref. (36)<br>Ref. (34) |
|        | 1687        | 18-96 | 53   | 170.7 (7.3) |            |            |            |           |           |              |           |            |                                                                                                         |
|        | 242         | 70-79 | 74   | 172.7 (6.2) |            |            |            |           |           |              |           |            |                                                                                                         |
|        | 141         | 60-97 | 76   | 173.3 (7.4) | 22.3       | 11.2       | 10.8       | 5.1       | 6.2 (0.3) | 47.5         |           |            |                                                                                                         |
|        | 244         |       |      |             |            |            |            |           |           |              |           |            |                                                                                                         |
| 55     | 22-80       | 50    |      |             |            | 2.7 (0.2)  | 5.7 (0.5)  |           |           |              |           |            |                                                                                                         |
| Female | 20          | 49-82 | 68   | 161.6 (7.0) | 20.5 (1.0) | 11.1 (1.3) | 12.6 (0.8) | 2.6 (0.3) | 4.8 (0.7) | 4.3 (0.3)    | 4.1 (0.4) | 43.9 (2.2) | Present study / Ref. (15)<br>Hamann-Todd Collection<br>Ref. (16)<br>Ref. (35)<br>Ref. (36)<br>Ref. (34) |
|        | 237         | 18-93 | 53   | 158.5 (8.4) |            |            |            |           |           |              |           |            |                                                                                                         |
|        | 197         | 70-79 | 74   | 157.9 (7.0) |            |            |            |           |           |              |           |            |                                                                                                         |
|        | 330         | 60-99 | 74   | 158.4 (6.6) | 20.1       | 10.9       | 11.1       | 4.5       | 5.4 (0.3) | 43.8         |           |            |                                                                                                         |
|        | 144         |       |      |             |            |            |            |           |           |              |           |            |                                                                                                         |
|        | 71          | 22-80 | 49   |             |            |            | 2.5 (0.2)  | 5.0 (0.5) |           |              |           |            |                                                                                                         |

Age is given in years. All skeletal measurements are in cm. The number in parentheses is the standard deviation.

Entries left blank were not provided by the source.

Hamann-Todd Collection: [http://www.cmnh.org/site/ResearchandCollections\\_PhysicalAnthropology\\_Collections\\_Hamann-ToddCollection.aspx](http://www.cmnh.org/site/ResearchandCollections_PhysicalAnthropology_Collections_Hamann-ToddCollection.aspx)

**Supplemental Table S4.** Pooled, male, female, and sex-specific models chosen by the different selection criteria. The criteria used to select each model are provided in parentheses next to the type of model. In the case of the stepwise method, the mode—i.e. backward or mixed—is only indicated when each mode selected a different set of variables.

| <b>Model</b>                       | <b>Based on</b> | <b>Variables</b>             | <b>R<sup>2</sup></b> | <b>adj-R<sup>2</sup></b> | <b>Reason(s) for rejection</b> |
|------------------------------------|-----------------|------------------------------|----------------------|--------------------------|--------------------------------|
| Pooled (stepwise, AICc, BIC)       | All data        | OC.H, Bi.B, P                | 0.76                 | 0.74                     |                                |
| Pooled (adj-R <sup>2</sup> )*      | All data        | OC.H, Bi.B, P, L5.T, FD      | 0.78                 | 0.74                     | P and FD are highly collinear. |
| Sex-Specific (AICc, BIC)           | All data        | Sex, OC.H, Bi.B              | 0.79                 | 0.77                     |                                |
| Sex-Specific (adj-R <sup>2</sup> ) | All data        | Sex, Age, OC.H, Bi.B, Max.W  | 0.81                 | 0.78                     |                                |
| Sex-Specific (stepwise-mixed)*     | All data        | Sex, OC.H, Bi.B, L5.T, P, FD | 0.80                 | 0.77                     | P and FD are highly collinear. |
| Sex-Specific (stepwise-backward)   | All data        | Sex, OC.H, Bi.B, P           | 0.79                 | 0.77                     |                                |

*Abbreviations are explained in Table 2.*

*Models marked by an asterisk (\*) were not considered for further analysis because they included too many variables, included variables with large p-values, or included variables that were highly collinear.*
